# Supplementary material for: Generation of salivary glands derived from pluripotent stem cells via conditional blastocyst complementation
Source: PubMed Central journal article supplement — Cell Rep. Author manuscript; Available in PMC 2024 Nov 21. (PMC11580835; doi:10.1016/j.celrep.2024.114340), 2024-06-11
Supplement: NIHMS2032684-supplement-Supplemental_Materials.pdf [file NIHMS2032684-supplement-Supplemental_Materials.pdf]

Cell Reports, Volume ■ ■

## Supplemental information

### Generation of salivary glands derived from pluripotent stem cells via conditional blastocyst complementation

**Junichi Tanaka, Akihiro Miura, Yuko Shimamura, Youngmin Hwang, Dai Shimizu, Yuri Kondo, Anri Sawada, Hemanta Sarmah, Zurab Ninish, Kenji Mishima, and Munemasa Mori**

A

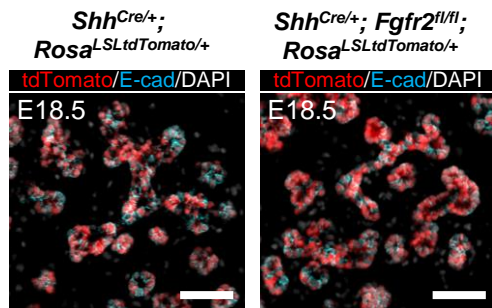

B

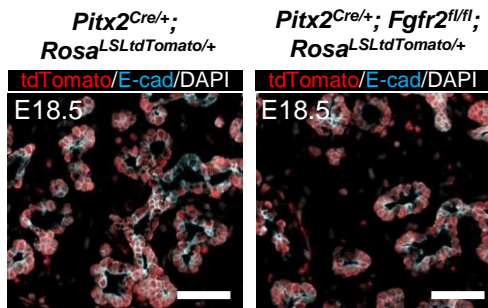

C

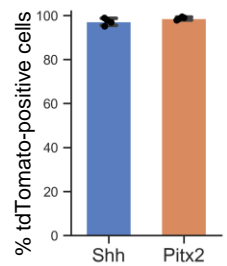

D

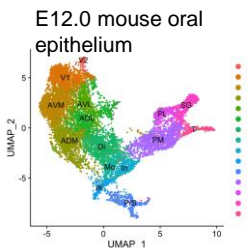

E

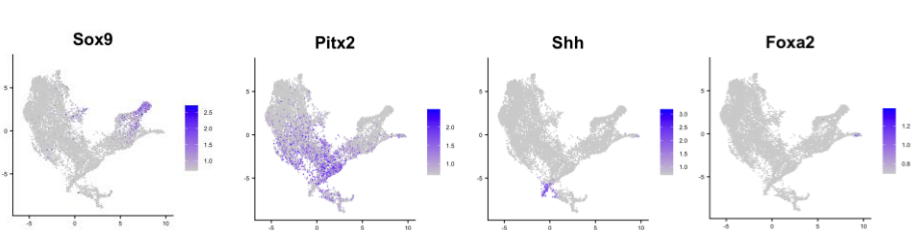

F

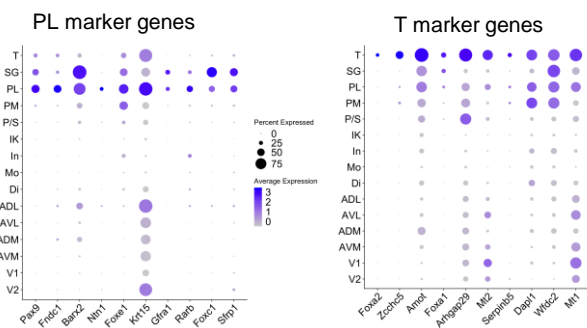

G

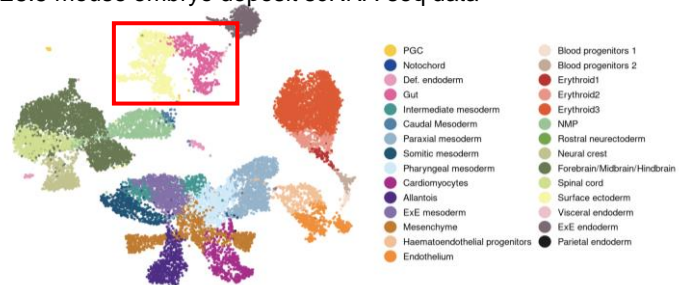

H

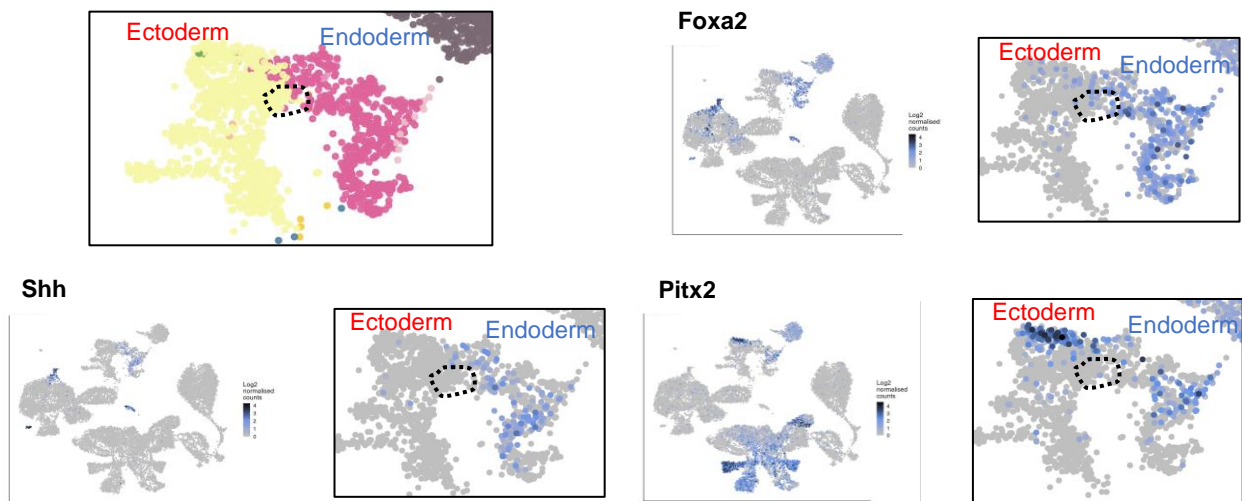

I

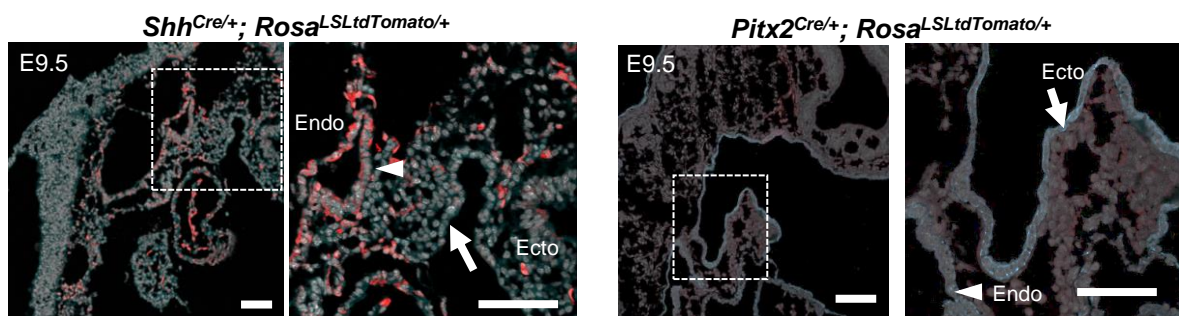

**Figure S1. Lineage-tracing, Fgfr2 loss of function, and scRNA-seq analysis of Cre driver candidate genes for CBC, Related to Figure 1**

**(A)** Representative confocal imaging of the salivary gland in the E18.5 *Shh<sup>Cre/+</sup>; Rosa<sup>L<sup>SL</sup>-tdTomato/+</sup>* (left) and *Shh<sup>Cre/+</sup>; Fgfr2<sup>flox/flox</sup>; Rosa<sup>L<sup>SL</sup>-tdTomato/+</sup>* mouse (right). Immunostaining of tdTomato: red, E-cadherin (E-cad): cyan, DAPI: gray. (N=3) **(B)** Representative confocal imaging of the salivary gland in the E18.5 *Pitx2<sup>Cre/+</sup>; Rosa<sup>L<sup>SL</sup>-tdTomato/+</sup>* (left) and *Pitx2<sup>Cre/+</sup>; Fgfr2<sup>flox/flox</sup>; Rosa<sup>L<sup>SL</sup>-tdTomato/+</sup>* mouse (right). Immunostaining of tdTomato: red, E-cadherin (E-cad): cyan, DAPI: gray. (N=3) **(C)** The morphometric analysis: % of tdTomato-positive cells in E-cad<sup>+</sup> epithelial cells from the E18.5 *Shh<sup>Cre/+</sup>; Rosa<sup>L<sup>SL</sup>-tdTomato/+</sup>* or *Pitx2<sup>Cre/+</sup>; Rosa<sup>L<sup>SL</sup>-tdTomato/+</sup>* mice. (N = 3 per biological replicates, 5 fields per group). Error bars represent mean  $\pm$  SD. **(D)** Annotated uniform manifold approximation projection (UMAP) plots of mouse oral epithelium at E12.0. Clusters assigned: ADL, anterodorsal-lateral; ADM, anterodorsal-medial; AVL, anteroventral-lateral; AVM, anteroventral-medial; Di, diastema; IK, initiation knot; In, incisor; Mo, molar; PL, posterior-lateral; PM, posterior-medial; P/S, periderm and suprabasal cells; SG, salivary gland; T, tongue; V1, ventral 1; V2, ventral 2. **(E)** Feature plots for the expression of candidate Cre-driver genes in mouse oral epithelium at E12.0. **(F)** Dot plots for top 10 differentially expressed genes of tongue (T) and posterior-lateral (PL) clusters. **(G)** Annotated UMAP plots of E8.5 mouse embryos. **(H)** Feature plots for the expression of candidate Cre-driver genes in E8.5 mouse embryos. Red dot area is the boundary region of the oral cavity. **(I)** Representative confocal imaging of the oral cavity in the E9.5 *Shh<sup>Cre/+</sup>; Rosa<sup>L<sup>SL</sup>-tdTomato/+</sup>* (left) and E9.5 *Pitx2<sup>Cre/+</sup>; Rosa<sup>L<sup>SL</sup>-tdTomato/+</sup>* mouse (right). Each right panel is an enlarged image of a white dotted box. Shh lineage labeled only the endoderm (Endo) (arrowhead) but not ectoderm (Ecto) (arrow). Pitx2 lineage labeled neither of them. tdTomato: red, DAPI: gray. (N=3) Scale bars: 100  $\mu$ m.

***Fgfr2*<sup>ckO</sup> ;*Rosa*<sup>LSL-tdTomato/+</sup> + nEGFP miPSC**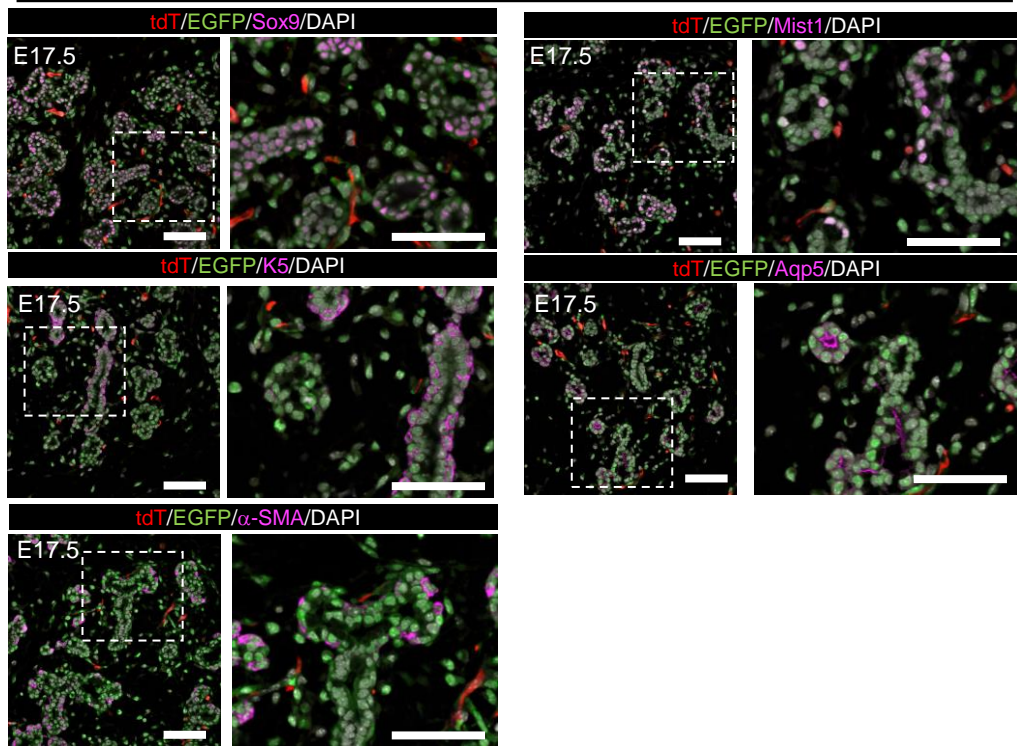

**Figure S2. The developing salivary glands rescued by the donor cells had normal salivary gland structure and differentiation, Related to Figure 3**

Representative IF-confocal imaging of complemented salivary gland from the E17.5 chimeric mice of *Fgfr2*<sup>ckO</sup>+nEGFP miPSC. The right panel is an enlarged image of a white dotted box. Immunostaining of tdTomato: red, EGFP: green, each cell type maker: cyan, DAPI: gray. (N=3) Scale bars: 100  $\mu$ m.

A

*Fgfr2*<sup>hetero</sup> ; *Rosa*<sup>LSL-tdTomato/+</sup>  
+ PSC<sup>CAG-EGFP</sup>

*Fgfr2*<sup>cKO</sup> ; *Rosa*<sup>LSL-tdTomato/+</sup>  
+ PSC<sup>CAG-EGFP</sup>

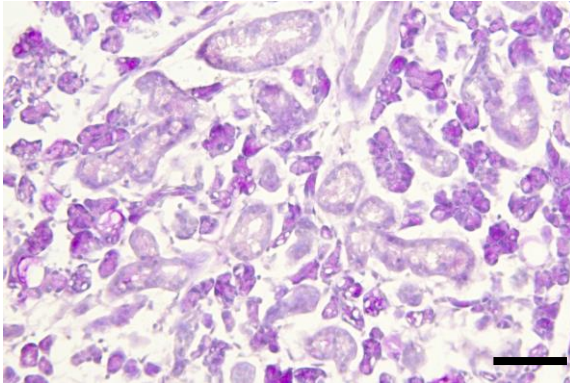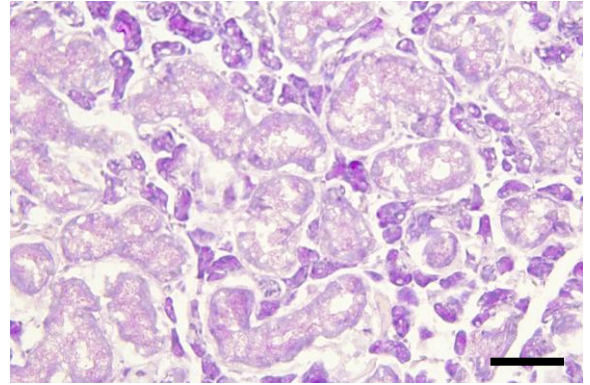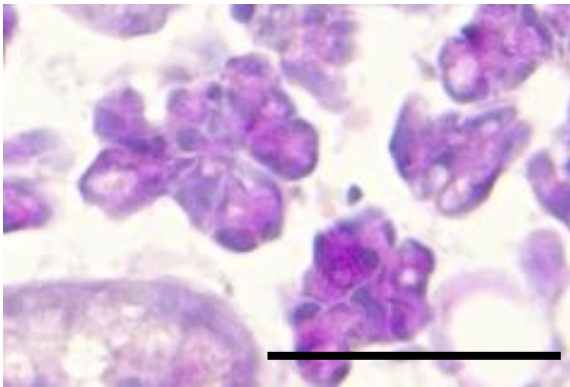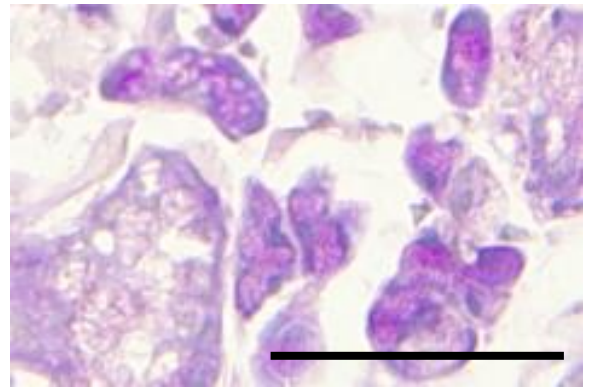

B

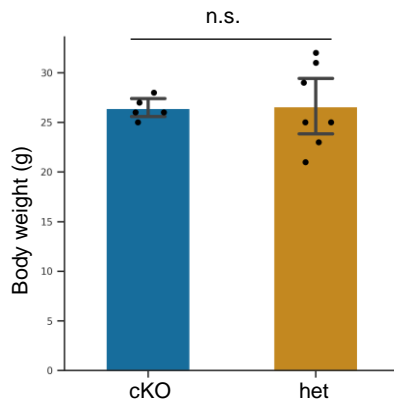

### Figure S3. The complemented salivary glands in adulthood had normal functions, Related to Figure 4

(A) Representative PAS-staining images of complemented salivary gland from the 4 weeks-old chimeric mice of *Fgfr2*<sup>cKO</sup>+ mPSCs or *Fgfr2*<sup>hetero</sup>+ mPSCs. The bottom panel is an enlarged image. (N=3) Scale bars: 100  $\mu$ m. (B) Analysis of body weight. Het: *Fgfr2*<sup>hetero</sup>, PSC<sup>CAG-EGFP</sup>, cKO: *Fgfr2*<sup>cKO</sup>, PSC<sup>CAG-EGFP</sup>. Statistical analyses: unpaired Student's t-test, significant:  $p < 0.05$ . no significant change: n.s. Error bars represent mean  $\pm$  SD.

**Table S1. Summary for conditional blastocyst complementation, Related to Figure 3**

| Cell Line              | host mice    | Number of host blastocysts | % survival (number of pups or embryos/number of transferred blastocysts) | % survival at P0 (number of pups survived P0/number of pups born) | % chimera formation at analysis | Analysis | % cKO genotyping | % Salivary gland complementation (Number of complementation in Fgfr2 cKO genotype ) |
|------------------------|--------------|----------------------------|--------------------------------------------------------------------------|-------------------------------------------------------------------|---------------------------------|----------|------------------|-------------------------------------------------------------------------------------|
| nGFP* iPSC             | <i>Foxa2</i> | 16                         | 75% (12/16)                                                              | -                                                                 | 83% (10/12)                     | E17.5    | 50% (5/10)       | 100% (5/5)                                                                          |
| PSC <sup>CAG-GFP</sup> | <i>Foxa2</i> | 78                         | 56% (44/78)                                                              | 77% (34/44)                                                       | 87% (27/31)                     | 4 weeks  | 21% (5/24)       | 100% (5/5)                                                                          |

**Table S2. E17.5 chimerism of Foxa2-driven Fgfr2 cKO conditional blastocyst complementation, Related to Figure 3**

|                                           | Liver (%)     | Hematopoietic cells (%) | Salivary gland |                |
|-------------------------------------------|---------------|-------------------------|----------------|----------------|
|                                           |               |                         | Epithelium (%) | Mesenchyme (%) |
| Fgfr2 cKO                                 | 56.2          | 71.3                    | 100            | 92.3           |
|                                           | 54.5          | 64.9                    | 100            | 59.4           |
|                                           | 48.3          | 62.9                    | 100            | 57.2           |
|                                           | 14.4          | 21.1                    | 100            | 48.4           |
| Fgfr2 hetero                              | 60.2          | 68.7                    | 63.4           | 81.1           |
|                                           | 55.8          | 70                      | 63             | 68.2           |
|                                           | 24.8          | 32                      | 88.5           | 59.8           |
|                                           | 9.7           | 12.6                    | 84             | 42.1           |
| <b>Average Chimerism in Fgfr2 cKO (%)</b> | <b>43.35</b>  | <b>55.05</b>            | <b>100</b>     | <b>64.325</b>  |
| <b>Average in Fgfr2 hetero (%)</b>        | <b>37.625</b> | <b>45.825</b>           | <b>74.725</b>  | <b>62.8</b>    |
